# Supplementary material for: Elevated KRAS protein level is associated with better survival in pancreatic cancer
Source: BMC Cancer. 2025 Jul 1;25:1080. doi: 10.1186/s12885-025-14461-w (PMC12211309; doi:10.1186/s12885-025-14461-w)
Supplement: Supplementary file 1 — Additional file 1. Histopathology characteristics for the patients with PDAC. Description: Study population N=41. Total range or percentage in the parenthesis. [file 12885_2025_14461_MOESM1_ESM.xlsx]

## Sheet: Ark1
	Additional file 1. Histopathology characteristics for the patients with PDAC.
	Variable	Total (N=41)
	Tumor size
	(cm, median, range)	3.5 (1.0-6.00)
	TNM	N (%)
	T1	4 (9.8 %)
	T2	2 (4.9 %)
	T3	35 (85.4 %)
	N1	31 (75.6 %)
	N0	10 (24.4 %)
	M1	1 (2.4 %)
	M0	40 (97.6 %)
	Differentiation grade	N (%)
	High	1 (2.4 %)
	Middle	25 (61.0 %)
	Low	15 (36.6 %)
	Resection border	N (%)
	R0	19 (46.3 %)
	R1	22 (53.7 %)
	Study population N=41. Total range or percentage in the parenthesis.
